# Supplementary material for: Clinical, FDG-PET and molecular markers of immune checkpoint inhibitor response in patients with metastatic Merkel cell carcinoma
Source: PubMed Central journal article supplement — J Immunother Cancer. 2020 Oct 15;8(2):e000700. doi: 10.1136/jitc-2020-000700 (PMC7566424; doi:10.1136/jitc-2020-000700), 2020-10-15
Supplement: jitc-2020-000700supp001.pdf [file jitc-2020-000700supp001.pdf]

## Supplementary methods

### Read alignment and quantification

FASTQ files were aligned with *STAR* (version 2.6.1d) to the human genome (version GRCh37) to generate bam files<sup>1</sup>. Gene expression quantification was performed with *Salmon* (version 0.12)<sup>2</sup>. Raw genewise counts to be used in downstream analyses were extracted as length scaled TPM values from *Salmon* outputs using the *Tximport* R package (version 1.12.0)<sup>3</sup>.

### Gene expression analysis

DGE analysis was performed with the *Limma* R package (version 3.40.2)<sup>4</sup>. GSEA was performed with *CAMERA*<sup>5</sup> using the hallmark and gene ontology (GO) gene sets from the Molecular Signatures Database (MSigDB)<sup>6</sup>.

### Confirmation of tumor viral status

Tumor viral status was confirmed by running *Xenomapper* against the MCPyV (NCBI Reference Sequence: NC\_010277.2) and human genome (GRCh37).

### Variant calling from RNA-Seq

Variants were called using a modified version of the GATK best practices for variant calling from RNA-Seq (<https://gatkforums.broadinstitute.org/gatk/discussion/3892/the-gatk-best-practices-for-variant-calling-on-rnaseq-in-full-detail>), with the exception that GATK version 4 rather than 3 was used (GATK version 4.1.0.0)<sup>7,8</sup>. Variants were also called using *VarScan* (version 2.4.3)<sup>9</sup> with a minimum of 8 bases of coverage and 3 bases supporting each variant call. To be considered a true call, the variant had to be called by both the GATK

*HaploypeCaller* and *VarScan*. To filter out germline variants, all variants present in the dbSNP (version 151) were removed and additionally any variant present in more than 20% of the cohort was removed. To remove mutations caused by RNA-editing, any sites present in the RADAR RNA-editing database<sup>10</sup> were also removed. The method was originally developed using 167 lung squamous cell carcinoma (LUSC) RNA-Seq samples from the TCGA with matched whole exome sequencing (WES) data. The method was able to call variants with only 6% recall, but 74% precision. The TMB from RNA-Seq variant calling was also validated against an external cohort made up of 11 WGS samples comprised of 9 cancer of unknown primary (CUP) and 2 MCC samples with a Pearson's correlation of 0.98. Despite the low recall rate, UV mutational signatures were still able to be identified and were dominant in the viral negative samples.

### **Calculation of TMB**

TMB was calculated for a given sample by counting the total number of exon bases that had a coverage of 8 or more using *Mosdepth* (version 0.2.5)<sup>11</sup>, dividing this by the total number of detected coding mutations and multiplying by 1 million (mutations/megabase).

### **Mutational signature generation**

Mutation signatures were generated for each sample in the cohort using *MutationalPatterns*<sup>12</sup>. The generated signatures were then matched to the single bases substitution (SBS) signatures from COSMIC v3<sup>13 14</sup>.

**Table S1. Genes used in determining cell-type-specific gene expression.** These gene sets were identified by Danaher et al<sup>15</sup> by using co-expression patterns from large tumor gene expression datasets to evaluate previously reported marker and gene lists.

| Gene     | Cell Type       |
|----------|-----------------|
| BLK      | B-cells         |
| CD19     | B-cells         |
| MS4A1    | B-cells         |
| TNFRSF17 | B-cells         |
| FCRL2    | B-cells         |
| KIAA0125 | B-cells         |
| PNOC     | B-cells         |
| SPIB     | B-cells         |
| TCL1A    | B-cells         |
| PTPRC    | CD45            |
| CD8A     | CD8 T cells     |
| CD8B     | CD8 T cells     |
| CTSW     | Cytotoxic cells |
| GNLV     | Cytotoxic cells |
| GZMA     | Cytotoxic cells |
| GZMB     | Cytotoxic cells |
| GZMH     | Cytotoxic cells |
| KLRB1    | Cytotoxic cells |
| KLRD1    | Cytotoxic cells |

|         |                 |
|---------|-----------------|
| KLRK1   | Cytotoxic cells |
| PRF1    | Cytotoxic cells |
| NKG7    | Cytotoxic cells |
| CCL13   | DC              |
| CD209   | DC              |
| HSD11B1 | DC              |
| CD244   | Exhausted CD8   |
| EOMES   | Exhausted CD8   |
| LAG3    | Exhausted CD8   |
| PTGER4  | Exhausted CD8   |
| CD163   | Macrophages     |
| CD68    | Macrophages     |
| CD84    | Macrophages     |
| MS4A4A  | Macrophages     |
| MS4A2   | Mast cells      |
| TPSAB1  | Mast cells      |
| CPA3    | Mast cells      |
| HDC     | Mast cells      |
| TPSB2   | Mast cells      |
| CSF3R   | Neutrophils     |
| S100A12 | Neutrophils     |
| CEACAM3 | Neutrophils     |
| FCAR    | Neutrophils     |

|         |                  |
|---------|------------------|
| FCGR3B  | Neutrophils      |
| FPR1    | Neutrophils      |
| SIGLEC5 | Neutrophils      |
| IL21R   | NK CD56dim cells |
| KIR2DL3 | NK CD56dim cells |
| KIR3DL1 | NK CD56dim cells |
| KIR3DL2 | NK CD56dim cells |
| NCR1    | NK cells         |
| XCL2    | NK cells         |
| XCL1    | NK cells         |
| CD3D    | T-cells          |
| CD3E    | T-cells          |
| CD3G    | T-cells          |
| CD6     | T-cells          |
| SH2D1A  | T-cells          |
| TRAT1   | T-cells          |
| TBX21   | Th1 cells        |
| FOXP3   | Treg             |

**Table S2. Hallmark gene sets.** Hallmark gene sets called as significantly enriched in patients with an observable response to ICI (FDR < 0.05).

| Gene set                           | Number of Genes | Direction | P Value    | False Discovery Rate |
|------------------------------------|-----------------|-----------|------------|----------------------|
| HALLMARK_E2F_TARGETS               | 199             | Down      | 1.10E-06   | 5.51E-05             |
| HALLMARK_MYC_TARGETS_V1            | 199             | Down      | 4.32E-06   | 1.08E-04             |
| HALLMARK_G2M_CHECKPOINT            | 198             | Down      | 1.66E-04   | 0.00210671           |
| HALLMARK_MTORC1_SIGNALING          | 198             | Down      | 2.10E-04   | 0.00210671           |
| HALLMARK_UNFOLDED_PROTEIN_RESPONSE | 110             | Down      | 2.11E-04   | 0.00210671           |
| HALLMARK_OXIDATIVE_PHOSPHORYLATION | 200             | Down      | 3.71E-04   | 0.00309176           |
| HALLMARK_UV_RESPONSE_UP            | 155             | Down      | 0.00373543 | 0.02668164           |

**Table S3. GO gene sets.** Gene ontology (GO) gene sets called as significantly enriched in patients with an observable response to ICI (FDR < 0.05).

| Gene set                                                          | Number of Genes | Direction | P Value  | False Discovery Rate |
|-------------------------------------------------------------------|-----------------|-----------|----------|----------------------|
| GO_ESTABLISHMENT_OF_PROTEIN_LOCALIZATION_TO_ENDOPLASMIC_RETICULUM | 103             | Down      | 1.18E-19 | 6.99E-16             |
| GO_PROTEIN_LOCALIZATION_TO_ENDOPLASMIC_RETICULUM                  | 122             | Down      | 3.63E-18 | 1.07E-14             |
| GO_CYTOSOLIC_RIBOSOME                                             | 107             | Down      | 6.17E-18 | 1.22E-14             |

|                                                                       |     |      |          |                |
|-----------------------------------------------------------------------|-----|------|----------|----------------|
| GO_TRANSLATIONAL_INITIATION                                           | 141 | Down | 3.48E-15 | 4.77E-12       |
| GO_CYTOSOLIC_LARGE_RIBOSOMAL_SUBUNIT                                  | 58  | Down | 4.04E-15 | 4.77E-12       |
| GO_NUCLEAR_TRANSCRIBED_MRNA_CATABOLIC_PROCESS_NONSENSE_MEDIATED_DECAY | 115 | Down | 1.47E-14 | 1.45E-11       |
| GO_PROTEIN_TARGETING_TO_MEMBRANE                                      | 152 | Down | 8.95E-14 | 7.56E-11       |
| GO_RIBOSOMAL_SUBUNIT                                                  | 157 | Down | 7.54E-13 | 5.58E-10       |
| GO_MULTI_ORGANISM_METABOLIC_PROCESS                                   | 135 | Down | 3.36E-12 | 2.21E-09       |
| GO_CYTOSOLIC_SMALL_RIBOSOMAL_SUBUNIT                                  | 41  | Down | 8.88E-11 | 5.25E-08       |
| GO_LARGE_RIBOSOMAL_SUBUNIT                                            | 92  | Down | 1.29E-10 | 6.91E-08       |
| GO_STRUCTURAL_CONSTITUENT_OF_RIBOSOME                                 | 198 | Down | 4.89E-09 | 2.41E-06       |
| GO_RIBOSOME                                                           | 216 | Down | 5.49E-09 | 2.50E-06       |
| GO_IMMUNOGLOBULIN_COMPLEX                                             | 21  | Down | 1.35E-08 | 5.64E-06       |
| GO_RNA_CATABOLIC_PROCESS                                              | 214 | Down | 1.43E-08 | 5.64E-06       |
| GO_SMALL_RIBOSOMAL_SUBUNIT                                            | 65  | Down | 1.87E-08 | 6.92E-06       |
| GO_CYTOSOLIC_PART                                                     | 200 | Down | 1.77E-07 | 6.14E-05       |
| GO_IMMUNOGLOBULIN_RECEPTOR_BINDING                                    | 22  | Down | 1.34E-06 | 4.41E-04       |
| GO_KERATINIZATION                                                     | 40  | Up   | 1.73E-06 | 5.37E-04       |
| GO_CORNIFIED_ENVELOPE                                                 | 33  | Up   | 3.17E-06 | 9.38E-04       |
| GO_VIRAL_LIFE_CYCLE                                                   | 278 | Down | 3.46E-06 | 9.68E-04       |
| GO_ESTABLISHMENT_OF_PROTEIN_LOCALIZATION_TO_MEMBRANE                  | 257 | Down | 3.60E-06 | 9.68E-04       |
| GO_CHAPERONE_MEDIATED_PROTEIN_FOLDING                                 | 47  | Down | 4.13E-06 | 0.001028<br>65 |
| GO_KERATIN_FILAMENT                                                   | 27  | Up   | 4.17E-06 | 0.001028       |

|                                                                           |     |      |          |                |
|---------------------------------------------------------------------------|-----|------|----------|----------------|
|                                                                           |     |      |          | 65             |
| GO_POSITIVE_REGULATION_OF_NUCLEASE_ACTIVITY                               | 15  | Down | 8.69E-06 | 0.002056<br>41 |
| GO_BITTER_TASTE_RECEPTOR_ACTIVITY                                         | 20  | Down | 1.29E-05 | 0.002935<br>93 |
| GO_RRNA_METABOLIC_PROCESS                                                 | 248 | Down | 1.96E-05 | 0.004288<br>99 |
| GO_PERK_MEDIATED_UNFOLDED_PROTEIN_RESPONSE                                | 11  | Down | 2.57E-05 | 0.005420<br>86 |
| GO_DNA_PACKAGING_COMPLEX                                                  | 57  | Down | 3.71E-05 | 0.007575<br>15 |
| GO_UNFOLDED_PROTEIN_BINDING                                               | 93  | Down | 4.23E-05 | 0.008340<br>14 |
| GO_PROTEIN_LOCALIZATION_TO_MEMBRANE                                       | 366 | Down | 5.14E-05 | 0.009523<br>35 |
| GO_DNA_PACKAGING                                                          | 141 | Down | 5.15E-05 | 0.009523<br>35 |
| GO_DETECTION_OF_CHEMICAL_STIMULUS_INVOLVED_IN_SENSORY_PERCEPTION_OF_TASTE | 31  | Down | 5.89E-05 | 0.010559<br>2  |
| GO_CYTOPLASMIC_TRANSLATION                                                | 40  | Down | 6.73E-05 | 0.011548<br>11 |
| GO_CELL_CYCLE_PHASE_TRANSITION                                            | 249 | Down | 6.83E-05 | 0.011548<br>11 |
| GO_KERATINOCYTE_DIFFERENTIATION                                           | 88  | Up   | 8.41E-05 | 0.013163<br>69 |



|                                                                   |     |      |          |                |
|-------------------------------------------------------------------|-----|------|----------|----------------|
| GO_INNER_MITOCHONDRIAL_MEMBRANE_PROTEIN_COMPLEX                   | 99  | Down | 8.63E-05 | 0.013163<br>69 |
| GO_PEPTIDE_CROSS_LINKING                                          | 44  | Up   | 8.73E-05 | 0.013163<br>69 |
| GO_PROTEIN_FOLDING_IN_ENDOPLASMIC_RETICULUM                       | 8   | Down | 8.78E-05 | 0.013163<br>69 |
| GO_ANTIGEN_BINDING                                                | 92  | Down | 8.90E-05 | 0.013163<br>69 |
| GO_CENTROMERE_COMPLEX_ASSEMBLY                                    | 36  | Down | 9.32E-05 | 0.013344<br>39 |
| GO_CHROMATIN_ASSEMBLY_OR_DISASSEMBLY                              | 129 | Down | 9.48E-05 | 0.013344<br>39 |
| GO_PROTEIN_DNA_COMPLEX_SUBUNIT_ORGANIZATION                       | 181 | Down | 1.11E-04 | 0.015303<br>04 |
| GO_PHAGOCYTOSIS_RECOGNITION                                       | 28  | Down | 1.17E-04 | 0.015707<br>39 |
| GO_PROTEIN_FOLDING                                                | 208 | Down | 1.30E-04 | 0.017079<br>88 |
| GO_PROTEIN_TARGETING                                              | 390 | Down | 1.47E-04 | 0.018889<br>63 |
| GO_HUMORAL_IMMUNE_RESPONSE_MEDIATED_BY_CIRCULATING_IMMUNOGLOBULIN | 52  | Down | 1.51E-04 | 0.018962<br>48 |
| GO_CELL_CYCLE_G2_M_PHASE_TRANSITION                               | 136 | Down | 1.68E-04 | 0.020646<br>39 |
| GO_ORGANIC_CYCLIC_COMPOUND_CATABOLIC                              | 396 | Down | 1.71E-04 | 0.020647       |

|                                                        |     |      |          |                |
|--------------------------------------------------------|-----|------|----------|----------------|
| _PROCESS                                               |     |      |          | 68             |
| GO_STRUCTURAL_CONSTITUENT_OF_MUSCLE                    | 36  | Up   | 1.90E-04 | 0.022347<br>1  |
| GO_PROTEIN_REFOLDING                                   | 19  | Down | 1.93E-04 | 0.022347<br>1  |
| GO_DNA_REPLICATION_INDEPENDENT_NUCLEOSOME_ORGANIZATION | 41  | Down | 1.97E-04 | 0.022425<br>82 |
| GO_ESTABLISHMENT_OF_PROTEIN_LOCALIZATION_TO_ORGANELLE  | 348 | Down | 2.03E-04 | 0.022674<br>57 |
| GO_RESPIRATORY_CHAIN                                   | 75  | Down | 2.19E-04 | 0.023632<br>61 |
| GO_OXIDATIVE_PHOSPHORYLATION                           | 80  | Down | 2.22E-04 | 0.023632<br>61 |
| GO_HISTONE_EXCHANGE                                    | 40  | Down | 2.24E-04 | 0.023632<br>61 |
| GO_ATP_DEPENDENT_CHROMATIN_REMODELING                  | 61  | Down | 2.52E-04 | 0.026137<br>86 |
| GO_B_CELL_MEDIATED_IMMUNITY                            | 81  | Down | 2.91E-04 | 0.029660<br>23 |
| GO_REGULATION_OF_NUCLEASE_ACTIVITY                     | 23  | Down | 3.08E-04 | 0.030243<br>19 |
| GO_POLYSOME                                            | 37  | Down | 3.12E-04 | 0.030243<br>19 |
| GO_TASTE_RECEPTOR_ACTIVITY                             | 22  | Down | 3.16E-04 | 0.030243<br>19 |

|                                                   |     |      |          |                |
|---------------------------------------------------|-----|------|----------|----------------|
| GO_MRNA_METABOLIC_PROCESS                         | 572 | Down | 3.17E-04 | 0.030243<br>19 |
| GO_MITOCHONDRIAL_PROTEIN_COMPLEX                  | 128 | Down | 3.30E-04 | 0.030949<br>74 |
| GO_AMIDE_BIOSYNTHETIC_PROCESS                     | 483 | Down | 3.36E-04 | 0.030949<br>74 |
| GO_EPIDERMAL_CELL_DIFFERENTIATION                 | 129 | Up   | 3.40E-04 | 0.030949<br>74 |
| GO_REGULATION_OF_CELL_CYCLE_G2_M_PHASE_TRANSITION | 57  | Down | 3.55E-04 | 0.031785<br>29 |
| GO_NUCLEAR_ENVELOPE_REASSEMBLY                    | 17  | Down | 3.64E-04 | 0.032123<br>51 |
| GO_RIBOSOME_BIOGENESIS                            | 295 | Down | 4.38E-04 | 0.037661<br>36 |
| GO_INTERMEDIATE_FILAMENT                          | 85  | Up   | 4.39E-04 | 0.037661<br>36 |
| GO_LYMPHOCYTE_MEDIATED_IMMUNITY                   | 124 | Down | 4.48E-04 | 0.037875<br>36 |
| GO_PROTEIN_LOCALIZATION_TO_ORGANELLE              | 533 | Down | 4.97E-04 | 0.041368<br>47 |
| GO_RIBONUCLEOPROTEIN_COMPLEX                      | 685 | Down | 5.24E-04 | 0.043009<br>03 |
| GO_INTERSPECIES_INTERACTION_BETWEEN_ORGANISMS     | 627 | Down | 5.37E-04 | 0.043505<br>89 |
| GO_MITOCHONDRIAL_ELECTRON_TRANSPORT_CHAIN         | 15  | Down | 5.59E-04 | 0.044657       |

|                        |  |  |  |   |
|------------------------|--|--|--|---|
| CYTOCHROME_C_TO_OXYGEN |  |  |  | 5 |
|------------------------|--|--|--|---|

## References

1. Dobin A, Davis CA, Schlesinger F, et al. STAR: ultrafast universal RNA-seq aligner. *Bioinformatics* 2013;29(1):15-21.
2. Patro R, Duggal G, Love MI, et al. Salmon provides fast and bias-aware quantification of transcript expression. *Nature methods* 2017;14(4):417.
3. Soneson C, Love MI, Robinson MD. Differential analyses for RNA-seq: transcript-level estimates improve gene-level inferences. *F1000Research* 2015;4
4. Ritchie ME, Phipson B, Wu D, et al. limma powers differential expression analyses for RNA-sequencing and microarray studies. *Nucleic acids research* 2015;43(7):e47-e47.
5. Wu D, Smyth GK. Camera: a competitive gene set test accounting for inter-gene correlation. *Nucleic acids research* 2012;40(17):e133-e33.
6. Liberzon A, Subramanian A, Pinchback R, et al. Molecular signatures database (MSigDB) 3.0. *Bioinformatics* 2011;27(12):1739-40.
7. McKenna A, Hanna M, Banks E, et al. The Genome Analysis Toolkit: a MapReduce framework for analyzing next-generation DNA sequencing data. *Genome research* 2010;20(9):1297-303.
8. DePristo MA, Banks E, Poplin R, et al. A framework for variation discovery and genotyping using next-generation DNA sequencing data. *Nature genetics* 2011;43(5):491.
9. Koboldt DC, Zhang Q, Larson DE, et al. VarScan 2: somatic mutation and copy number alteration discovery in cancer by exome sequencing. *Genome research* 2012;22(3):568-76.
10. Ramaswami G, Li JB. RADAR: a rigorously annotated database of A-to-I RNA editing. *Nucleic acids research* 2013;42(D1):D109-D13.
11. Pedersen BS, Quinlan AR. Mosdepth: quick coverage calculation for genomes and exomes. *Bioinformatics* 2017;34(5):867-68.
12. Blokzijl F, Janssen R, Van Boxtel R, et al. MutationalPatterns: comprehensive genome-wide analysis of mutational processes. *Genome medicine* 2018;10(1):33.
13. Alexandrov L, Kim J, Haradhvala NJ, et al. The repertoire of mutational signatures in human cancer. *BioRxiv* 2018:322859.
14. Tate JG, Bamford S, Jubb HC, et al. COSMIC: the catalogue of somatic mutations in cancer. *Nucleic acids research* 2018;47(D1):D941-D47.
15. Danaher P, Warren S, Dennis L, et al. Gene expression markers of tumor infiltrating leukocytes. *Journal for immunotherapy of cancer* 2017;5(1):18.
